# Supplementary material for: Adaptation of Cyanobacteria to the Endolithic Light Spectrum in Hyper-Arid Deserts
Source: MDPI journal article supplement (doi:10.3390/microorganisms10061198), 2022-06-11
Supplement: s1 [file s1]

## SUPPLEMENTARY MATERIAL

### Adaptation of cyanobacteria to the endolithic light spectrum in hyper-arid deserts

Bayleigh Murray, Emine Ertekin, Micah Dailey, Nathan T. Soulier, Gaozhong Shen, Donald A. Bryant, Cesar Perez-Fernandez, Jocelyne DiRuggiero

**Table S1.** Metadata and metagenome accession numbers for endolithic isolates

| Strain name | Origin                                  | Substrate | Taxonomy                 | IMG ID     |
|-------------|-----------------------------------------|-----------|--------------------------|------------|
| S-NGV-2P1   | Timna Park, Negev Desert, Israel        | sandstone | <i>Chroococcidiopsis</i> | 3300039401 |
| G-MTQ-3P2   | Monturaqui, Atacama Desert, Chile       | gypsum    | <i>Chroococcidiopsis</i> | 3300037877 |
| C-VL-3P3    | Valle de la Luna, Atacama Desert, Chile | calcite   | <i>Chroococcidiopsis</i> | 3300039404 |

**Table S2.** Gene distribution in the FaRLiP cluster of *Chroococcidiopsis* G-MTQ-3P2

| genome locus                 | function                                             | gene symbol       | annotation | protein size (aa) | gene size (bp) |
|------------------------------|------------------------------------------------------|-------------------|------------|-------------------|----------------|
| Ga0395813_0004_87482_87718   | photosystem II PsbH protein                          | <i>psb H2</i>     | KO:K02709  | 78                | 234            |
| Ga0395813_0004_87766_89256   | photosystem II CP47 chlorophyll apoprotein           | <i>psb B2</i>     | KO:K02704  | 496               | 1488           |
| Ga0395813_0004_89765_91165   | photosystem II CP43 chlorophyll apoprotein           | <i>psb C2</i>     | KO:K02705  | 466               | 1398           |
| Ga0395813_0004_91234_92292   | photosystem II P680 reaction center D2 protein       | <i>psb D3</i>     | KO:K02706  | 352               | 1056           |
| Ga0395813_0004_92384_92905   | FRL-allophycocyanin                                  | <i>apc D3</i>     | KO:K02095  | 173               | 519            |
| Ga0395813_0004_92871_95210   | phycobilisome core-membrane linker protein           | <i>apc E2</i>     | KO:K02096  | 779               | 2337           |
| Ga0395813_0004_95279_95758   | FRL-allophycocyanin                                  | <i>apc D2</i>     | KO:K02095  | 159               | 477            |
| Ga0395813_0004_95873_96358   | allophycocyanin beta subunit                         | <i>apc B2</i>     | KO:K02093  | 161               | 483            |
| Ga0395813_0004_96460_96936   | FRL-allophycocyanin                                  | <i>apc A2</i>     | KO:K02095  | 158               | 474            |
| Ga0395813_0004_97067_98065   | photosystem II P680 reaction center D1 protein       | <i>psb A3</i>     | KO:K02703  | 332               | 996            |
| Ga0395813_0004_98412_99542   | photosystem II P680 reaction center D1 protein       | <i>chl F</i>      | KO:K02703  | 376               | 1128           |
| Ga0395813_0004_99771_100004  | hypothetical protein                                 | hypothetical      |            |                   |                |
| Ga0395813_0004_100391_102259 | DNA-binding response OmpR family regulator           | <i>rfp B</i>      | COG0745    | 622               | 1866           |
| Ga0395813_0004_102532_105279 | light-regulated signal transduction histidine kinase | <i>rfp A</i>      | COG4251    | 915               | 2745           |
| Ga0395813_0004_105417_105794 | CheY-like chemotaxis protein                         | <i>rfp C</i>      | COG0784    | 125               | 375            |
| Ga0395813_0004_106087_106524 | CheY-like chemotaxis protein                         | <i>che Y-like</i> | COG0784    | 145               | 435            |
| Ga0395813_0004_106961_109309 | photosystem I P700 chlorophyll a apoprotein A1       | <i>psa A2</i>     | KO:K02689  | 782               | 2346           |
| Ga0395813_0004_109455_111677 | photosystem I P700 chlorophyll a apoprotein A2       | <i>psa B2</i>     | KO:K02690  | 740               | 2220           |
| Ga0395813_0004_112052_112603 | photosystem I subunit 11                             | <i>psa L2</i>     | KO:K02699  | 183               | 549            |
| Ga0395813_0004_112614_112838 | photosystem I subunit 8                              | <i>psa l2</i>     | KO:K02696  | 74                | 222            |

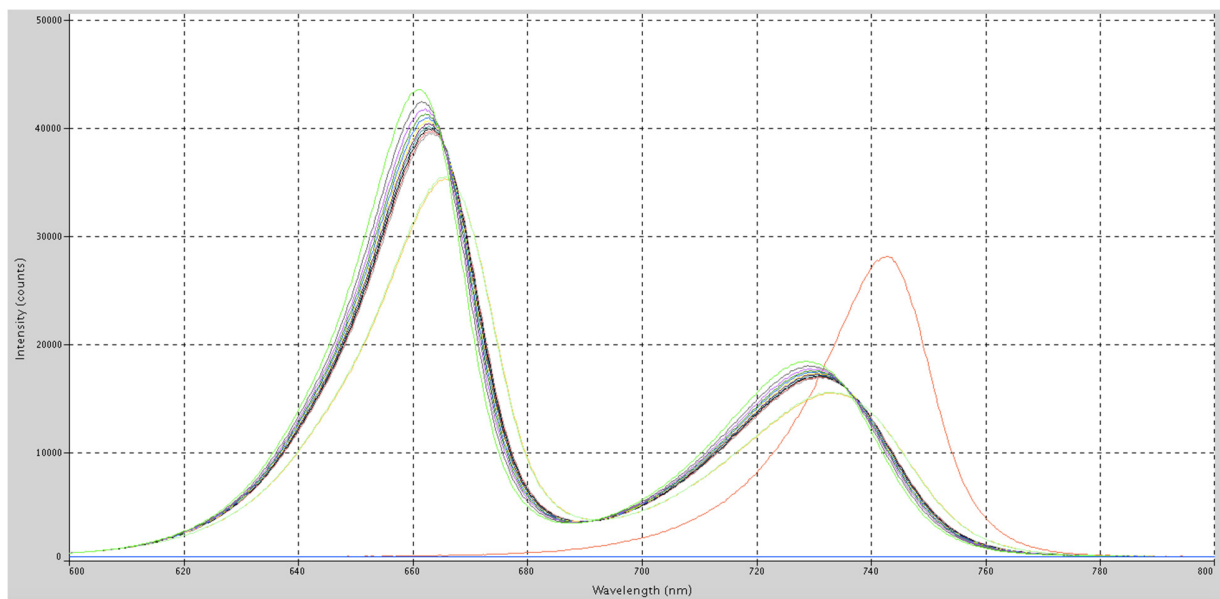

**Figure S1.** Spectra of white and far-red lights used in growth experiments. The VL spectrum is represented by multiple colored lines with absorption maxima at 665 and 730 nm. The FRL spectrum is represented by the red line with absorption maximum at 745 nm.

|                            |     |                                                                                     |     |
|----------------------------|-----|-------------------------------------------------------------------------------------|-----|
| 9212 Chl <i>f</i> synthase | 1   | [21]TANKLSKRR---KKVNYWEKFCSSVWTSTENRLYVGWFGVLMIPCVLTAATV-FIIAIIAAPVDMDGIGVPISGSI    | 93  |
| Ga0395813_0004_98412_99542 | 1   | [22]VTNEL-KKR---ESASIWDRFCNVWTSTENRLYIGWFGVLMIPCMLTAASV-FIIAMIAAPAVDMGMSPTIGSL      | 93  |
| Ga0395813_0004_97067_98065 | 1   | -----MIP-LLGVSIcFTIAFIAAPVVDIDGIREPVAGSL                                            | 35  |
| Ga0395813_0013_94225_95307 | 1   | MTTTL-QRE---RSSSLWDRFCNVWTSTENRIYVGWFGVLMIPTLLSATIC-FIIAFIAAPVVDIDGIREPVAGSL        | 71  |
| Ga0395813_0035_54237_55319 | 1   | MNTIV-QRRpelEIAKVWNRFCVWTSTDNRIYIGWFGVLMIPTLLTASIC-FILAFIAAPVVDLDGIREPVIGSL         | 74  |
| Ga0395813_0043_12497_13573 | 1   | MTTTL-QRR---SSANVWDRFCDWIVSIENRLYIGWFGVLMIPTLLAATTC-FIIAFIAAPVVDIDGIREPVAGSL        | 71  |
| Ga0395813_0043_46650_47348 | 1   | MTTTL-QRR---ESASLWEQFCNVWASTENRLYIGWFGVLMIPTLLAATTC-FIVAFIAAPVVDIDGIREPVAGSL        | 71  |
| 9212 Chl <i>f</i> synthase | 94  | LSGNNIITAAVVPTSAAGLHFYPIWEAASIDEWLYNGGFPYQLIVLHFLIGIIAYQDREWELSYRLGMRPWISLAFTAPV    | 173 |
| Ga0395813_0004_98412_99542 | 94  | LDGNNIITAAVVPTSAAGLHFYPIWEAASLDEWLYNGGFPYQLIVLHFLIGIICYQDREWELSYRLGMRPWISLAFTAPV    | 173 |
| Ga0395813_0004_97067_98065 | 36  | LYGNNITGAVVPMSSNAIGLHFYPIWEAASMDWLYNGGFPYQMGIFHYIPALACYMGREWELSYRLGMRPWIAVAYSAPF    | 115 |
| Ga0395813_0013_94225_95307 | 72  | IYGNNISGAVVPMSSNAIGLHFYPIWEAASLDEWLYNGGFPYQLVIFHFLIGFCFCYMGROWELSYRLGMRPWICVAYSAPL  | 151 |
| Ga0395813_0035_54237_55319 | 75  | MGGNNLITAAVVPTSAAGLHFYPIWEAASMDWLYNGGFPYQLIVLHFLIGIWCYLGRLWEVSYRLGMRPWIAVAFSAPA     | 154 |
| Ga0395813_0043_12497_13573 | 72  | LYGNNISGAVVPMSSNAIGLHFYPIWEAASLDEWLYNGGFPYQLVIFHFLIGVFCYLGREWELSYRLGMRPWIAVAYSAPV   | 151 |
| Ga0395813_0043_46650_47348 | 72  | IYGNNISGAVVPMSSNAIGLHFYPIWEAASLDEWLYNGGFPYQLVIFHFLIGVFCYMGREWELSYRLGMRPWICVAYSAPV   | 151 |
| 9212 Chl <i>f</i> synthase | 174 | AASVSVLLIYFVGQGSLSAGMPLGISGTFHFMFLQFQADHNILMSPLHQLGVIGVLGGFAAAMHGSLVSTSLIRSHN [2]   | 252 |
| Ga0395813_0004_98412_99542 | 174 | AASISVFLVYFVGQGSFSAAGMPLGISGTFNFMFLRFQADHNILMSPLHQLGVIGVLGGAFSAAMHGSLVSTSLIRSHN [5] | 255 |
| Ga0395813_0004_97067_98065 | 116 | AATSSVFLIYPIGQGSFSGLPMGISGTFNFMFLVQADHNILMHPFHLGVAGVLGGSLFCAMHGSLVSTSLIRETS         | 192 |
| Ga0395813_0013_94225_95307 | 152 | ASATAVFLIYPIGQGSFSGLMPLGISGTFNFMFLVQADHNILMHPFHLQGVAAVFGGALFCAMHGSLVSTSLVRETT       | 228 |
| Ga0395813_0035_54237_55319 | 155 | AAATAVLLVYPIGQGSFADGLPLGIAGTFNFMFLAVQADHNILMHPFHLGVAGVFGGALLSALHGSLVSTSLIRQTO [1]   | 232 |
| Ga0395813_0043_12497_13573 | 152 | AAATAVFLIYPIGQGSFSGLMPLGISGTFNFMFLVQADHNILMHPFHLQGVAGVFGGALFSTMHGSLVSTSLVRETT       | 228 |
| Ga0395813_0043_46650_47348 | 152 | AAATAVFLIYPIGQGSFSGLMPLGISGTFNFMFLVQADHNILMHPFHLQGVAGVFGGALFSAMHGSLVSTSLVRETT       | 228 |
| 9212 Chl <i>f</i> synthase | 253 | ESESINKGYKLGQHQHTYINFRSAQ-VYLWHLIWRQVSF PNSRKLHFFLAALPVAIGWSAALGVDIAAFDFDYLQFHQ     | 328 |
| Ga0395813_0004_98412_99542 | 256 | PTESTNTGYKLGQKRPTYSFRAAQ-LYLWRLIWRGTSF PNSRRLHFFLAAPFVAGIWSAALGVDIAAFNFEKLNFEP      | 331 |
| Ga0395813_0004_97067_98065 | 193 | DSESQNYGYKFGQSEETYNIVAAH-GYFGRLI FQYASF NNSRSLHFFLAAPFVVCINAVAGLSTMAFNNGFNFN        | 268 |
| Ga0395813_0013_94225_95307 | 229 | ETESQNYGYKFGQSEETYNIVAAH-GYFGRLI FQYASF NNSRSLHFFLAGAWPVVGIFWFTALGISTMAFNNGFNFNQ    | 304 |
| Ga0395813_0035_54237_55319 | 233 | -HESVNAGYKLGQSQMTYHYLAGHYGFLGRLLVFPWFS QNHRAFFHFLAALPTIGIWFATAGICSVAFGLNGFNFNH      | 308 |
| Ga0395813_0043_12497_13573 | 229 | EIESLNNGYKFGQSEETYNIVAAH-GYFGRLVGRITNEI [5] ANSRSLHFFLAIPVVMGIWFTSLGISTMAFNNGFNFNQ  | 309 |
| Ga0395813_0043_46650_47348 | 229 | ETESQ-----                                                                          | 233 |
| 9212 Chl <i>f</i> synthase | 329 | PELKSQGGQIHTWADTIDWASLGKIVLDRIHYDFPENLTAGEVVPWK                                     | 376 |
| Ga0395813_0004_98412_99542 | 332 | THIESQGRVTNTWANAIDWANLGDMDARDRLHQFPTDL---MTVSSE                                     | 376 |
| Ga0395813_0004_97067_98065 | 269 | SVLDSQGHVLPWTWADVLNRRANLGFVEMHERNAHNFPIHLACGDAVEPA [16]                             | 332 |
| Ga0395813_0013_94225_95307 | 305 | SVLDSQGRVNTWADVLNRRANLGMVEMHERNAHNFPIHLASGEATPVA [ 8]                               | 360 |
| Ga0395813_0035_54237_55319 | 309 | SILDSSGRVVTEADLLNRADLGIQAMAVNTHHFPNIHGGGIQPVN [ 4]                                  | 360 |
| Ga0395813_0043_12497_13573 | 310 | SILDSSGRVNTWADILNRRANLGMVEMHERNAHNFPIHLASVEA---- [ 5]                               | 358 |
| Ga0395813_0043_46650_47348 |     | -----                                                                               |     |

**Figure S2.** Protein alignment of Chl *f* synthase from *Chlorogloeopsis fritschii* PCC 9212 (9212 Chl *f* synthase) with Chl *f* synthase identified in the G-MTQ-3P2 (Ga0395813\_0004\_98412\_99542), as well as all annotated *psbA* genes. Ligands to the Mn<sub>4</sub>Ca<sub>1</sub>O<sub>5</sub> cluster are highlighted in light blue. Tyrosine Yz residues are highlighted in yellow. Histidine residues thought to be involved in binding P680 Chl *a* are highlighted in green. Residues thought to ligate an additional Chl *a* are in green font. Residues involved in proton-coupled electron transport are highlighted in pink. Black residues are conserved across all sequences and red residues are not. Ga0395813\_0004\_98412\_99542 lacks any ligands to the Mn<sub>4</sub>Ca<sub>1</sub>O<sub>5</sub> cluster, characteristic of Chl *f* synthase [17].
